# Supplementary material for: Callistemon-like Zn and S codoped CoP nanorod clusters as highly efficient electrocatalysts for neutral-pH overall water splitting
Source: Royal Society of Chemistry journal article supplement (doi:10.1039/c9ta08812a), 2019-01-01
Supplement: c9ta08812a1.pdf [file c9ta08812a1.pdf]

## Supporting Information

### **Callistemon-like Zn and S codoped CoP nanorod clusters as highly efficient electrocatalysts for neutral-pH overall water splitting**

Liang Yan, Bing Zhang, Junlu Zhu, Zhonggang Liu, Haiyan Zhang and Yunyong Li\*

*Guangdong Provincial Key Laboratory of Functional Soft Condensed Matter, School of Materials and Energy, Guangdong University of Technology, No. 100 Waihuan Xi Road, Guangzhou Higher Education Mega Center, Guangzhou, 510006, China*

*\*Corresponding author.*

*E-mail address: yyli@gdut.edu.cn (Y. Li)*

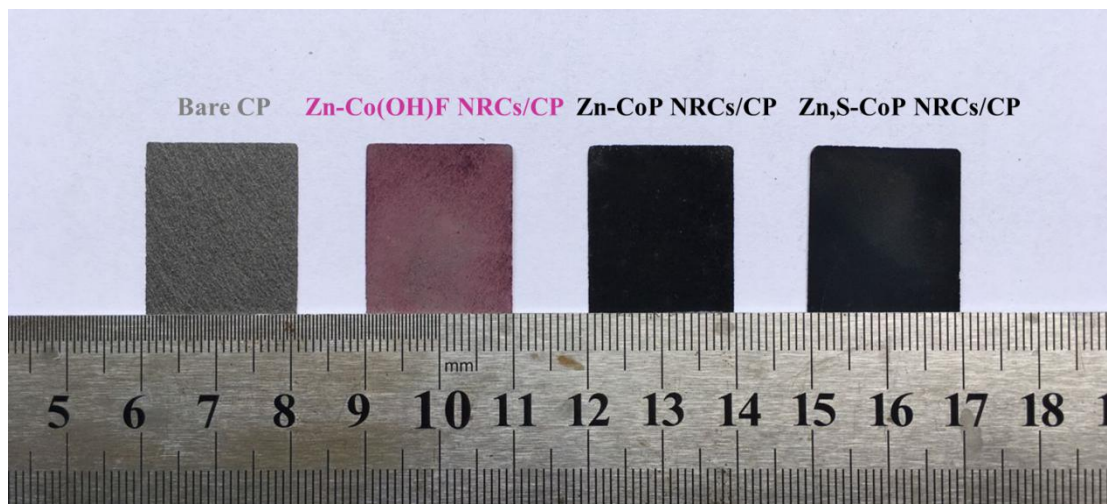

**Figure S1.** Optical photographs of bare CP, Zn-Co(OH)F NRCs/CP, Zn-CoP NRCs/CP, and Zn,S-CoP NRCs/CP.

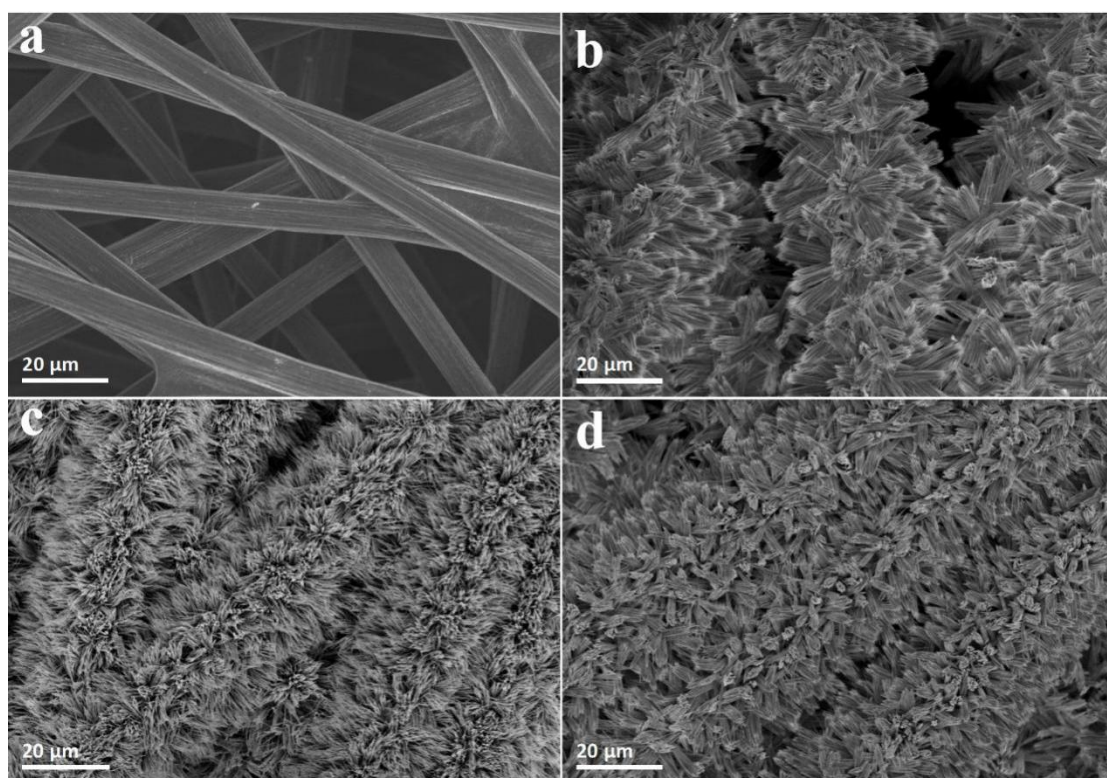

**Figure S2.** SEM images of (a) bare CP, (b) Zn-Co(OH)F NRCs/CP, (c) Zn-CoP NRCs/CP, and (d) Zn,S-CoP NRCs/CP.

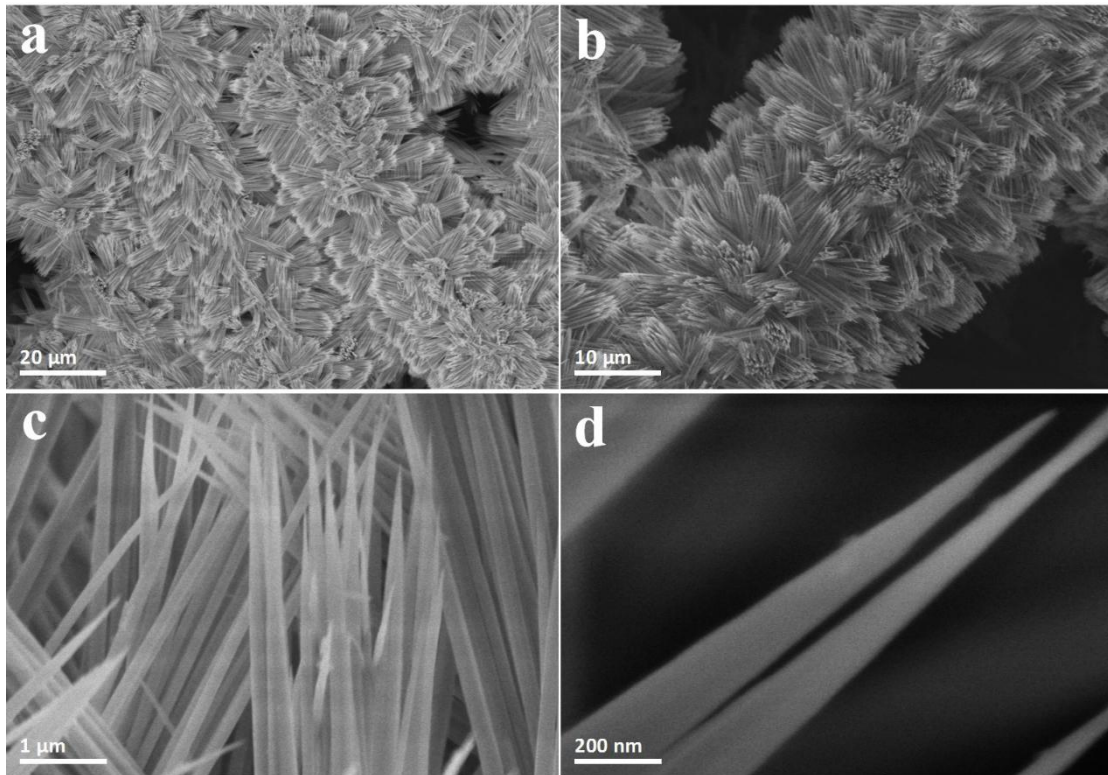

**Figure S3.** (a,b) Low-magnification and (c,d) high-magnification SEM images of Zn-Co(OH)F NRCs/CP.

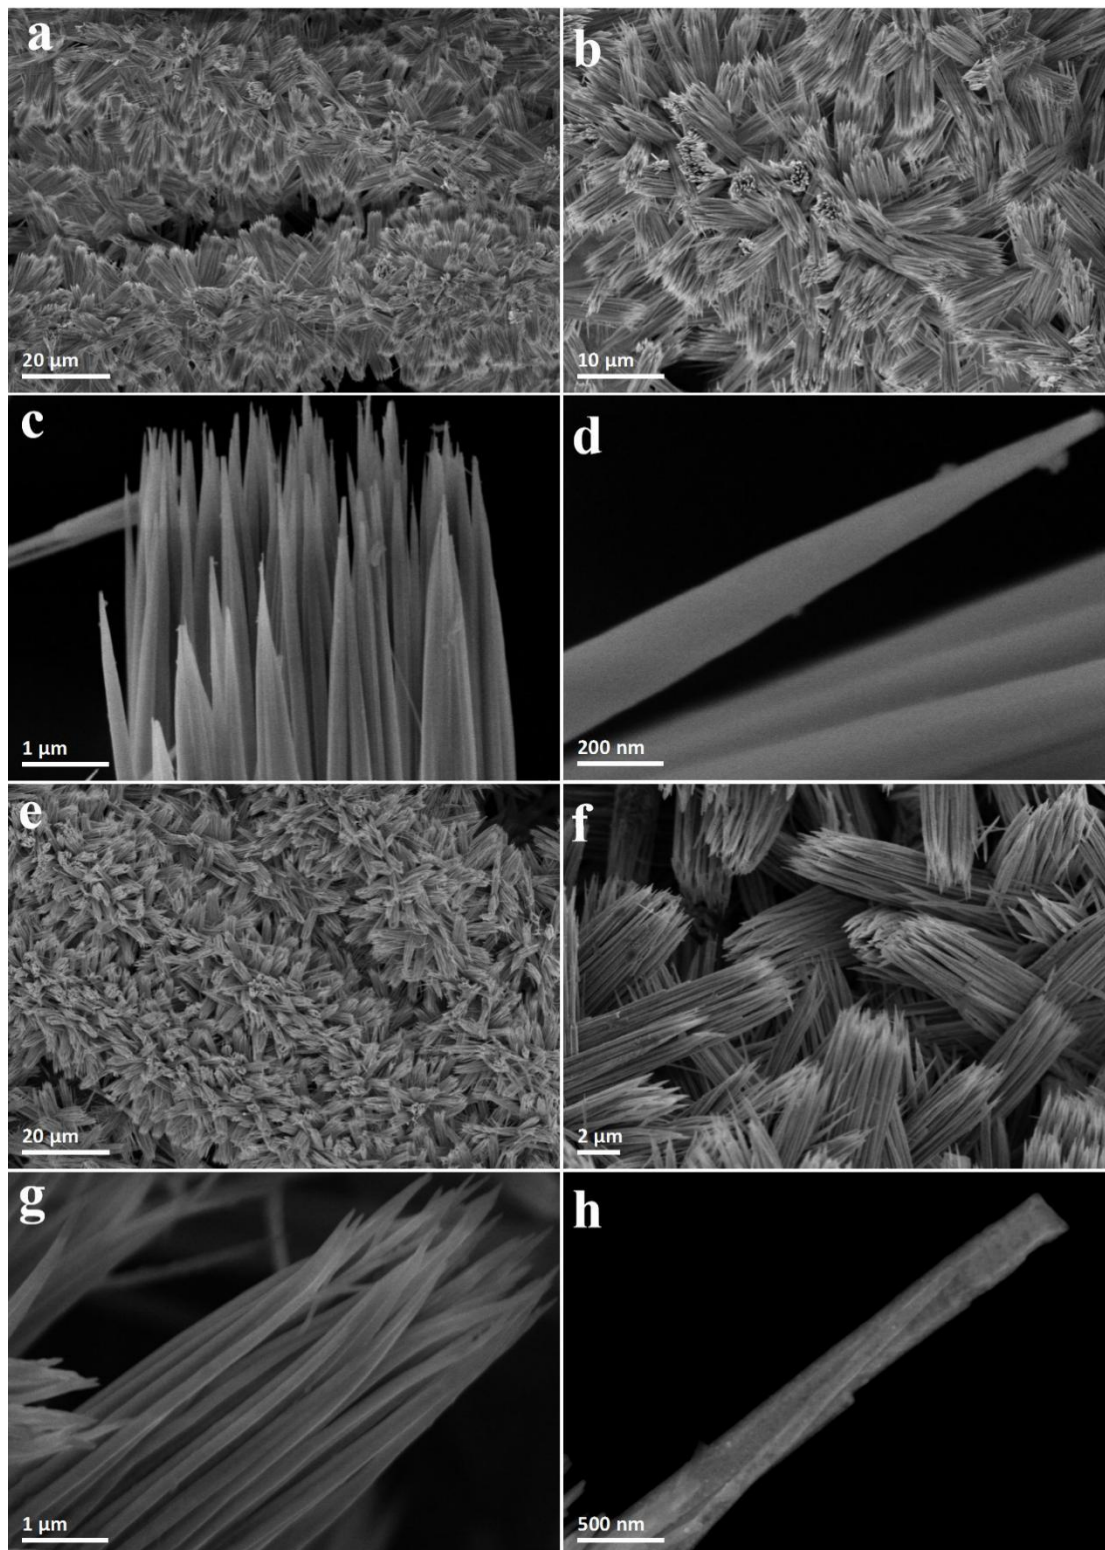

**Figure S4.** (a,b) Low-magnification and (c,d) high-magnification SEM images of Co(OH)F NRCs/CP. (e,f) Low-magnification and (g,h) high-magnification SEM images of CoP NRCs/CP.

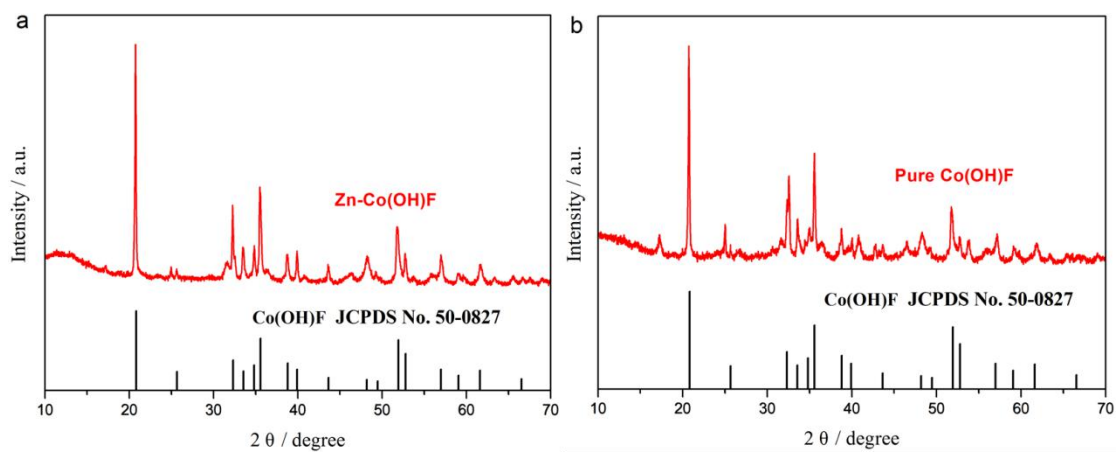

**Figure S5.** XRD patterns of (a) Zn-Co(OH)F NRCs and (b) pure Co(OH)F NRCs.

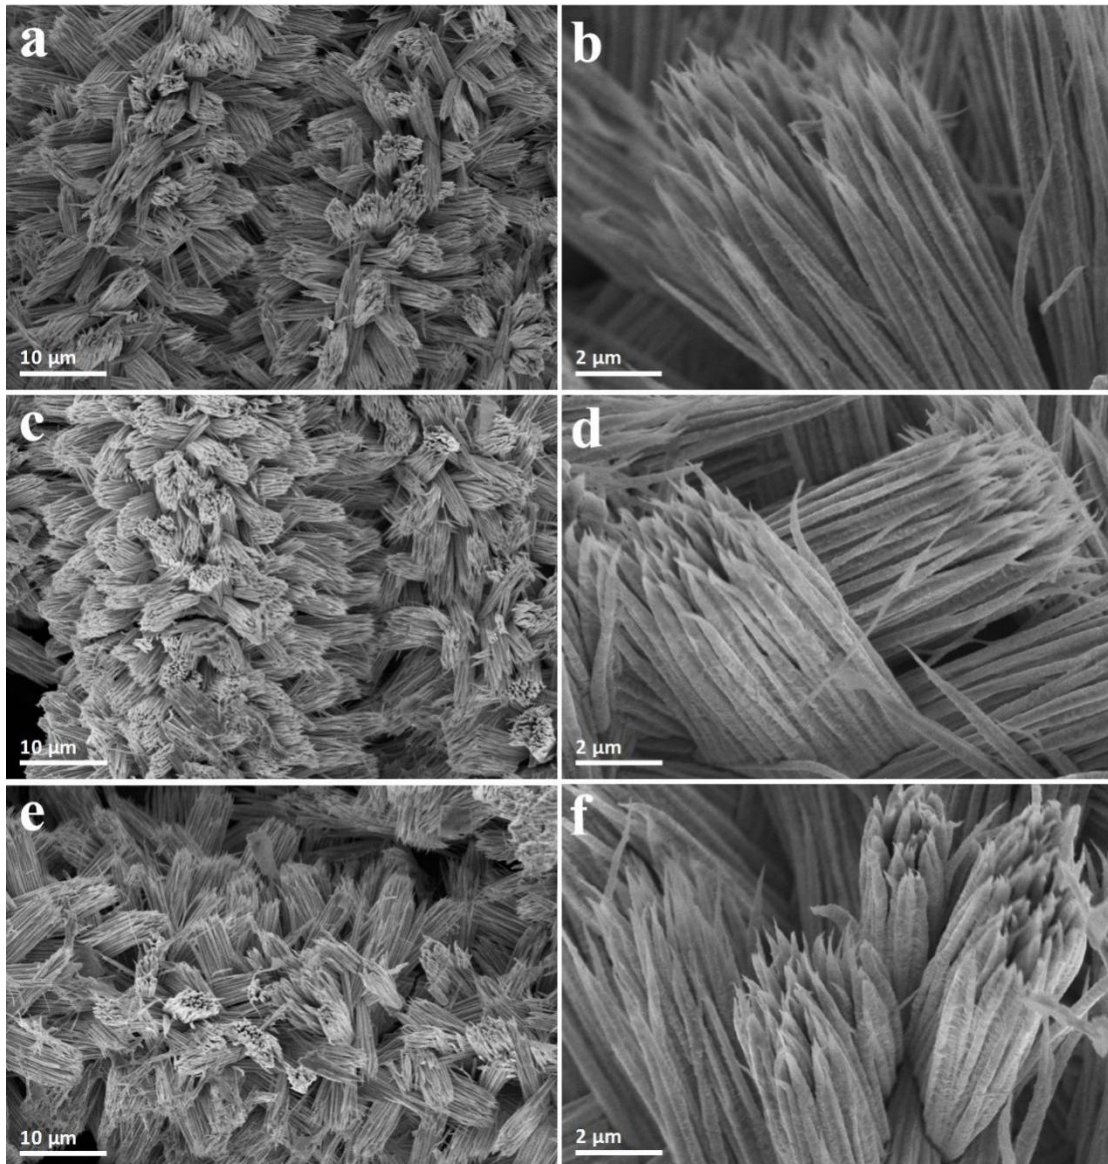

**Figure S6.** SEM images of (a,b)  $\text{Zn}_{0.025}\text{S-Co}_{0.975}\text{P}$  NRCs/CP, (c,d)  $\text{Zn}_{0.05}\text{S-Co}_{0.95}\text{P}$  NRCs/CP, and (e,f)  $\text{Zn}_{0.1}\text{S-Co}_{0.9}\text{P}$  NRCs/CP.

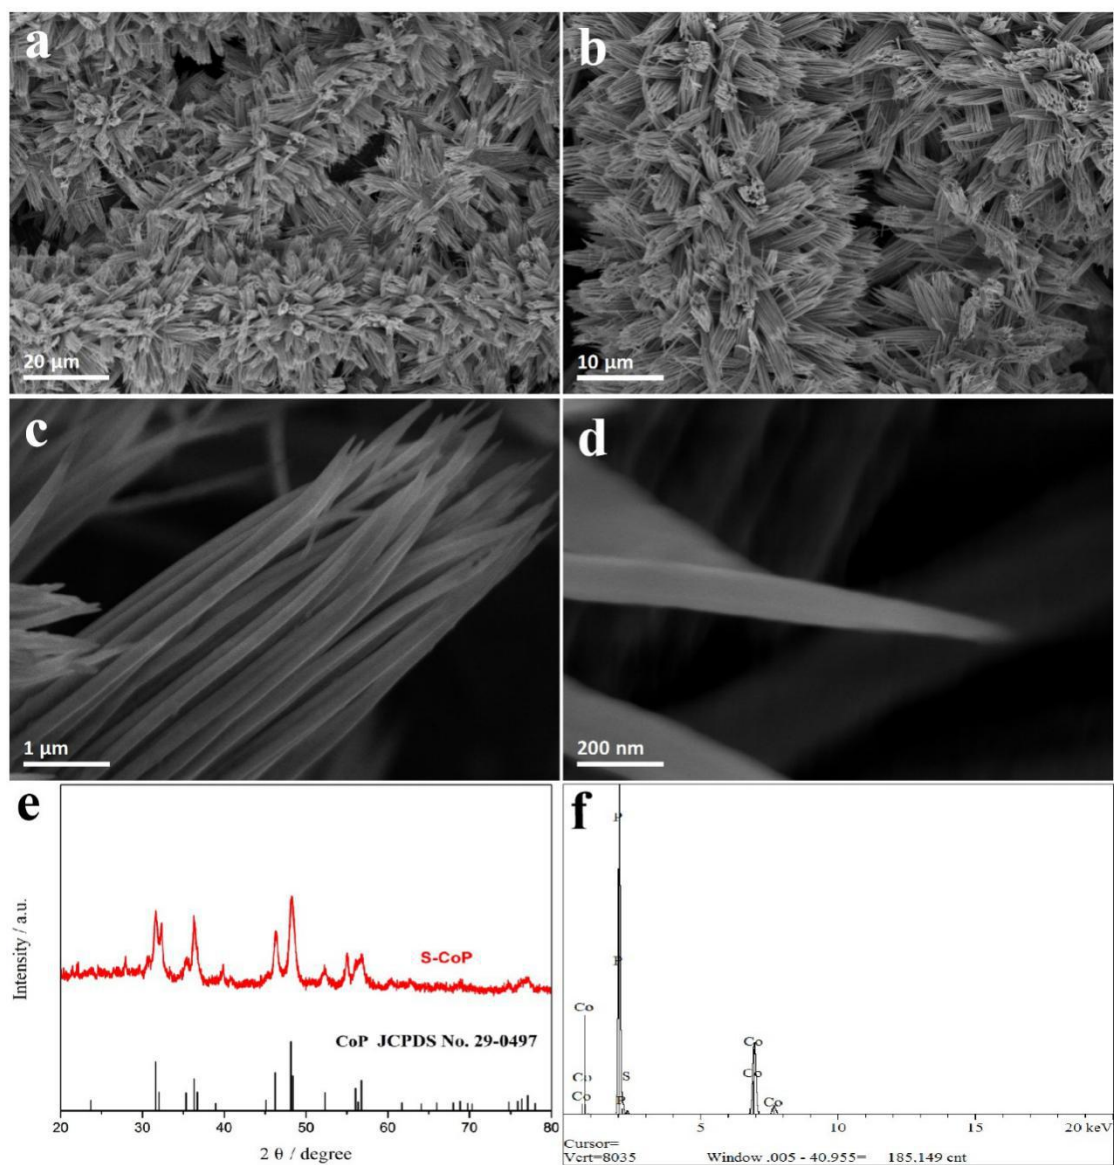

**Figure S7.** (a,b) Low-magnification and (c,d) high-magnification SEM images, (e) XRD pattern, and (f) EDX pattern of S-CoP NRCs/CP.

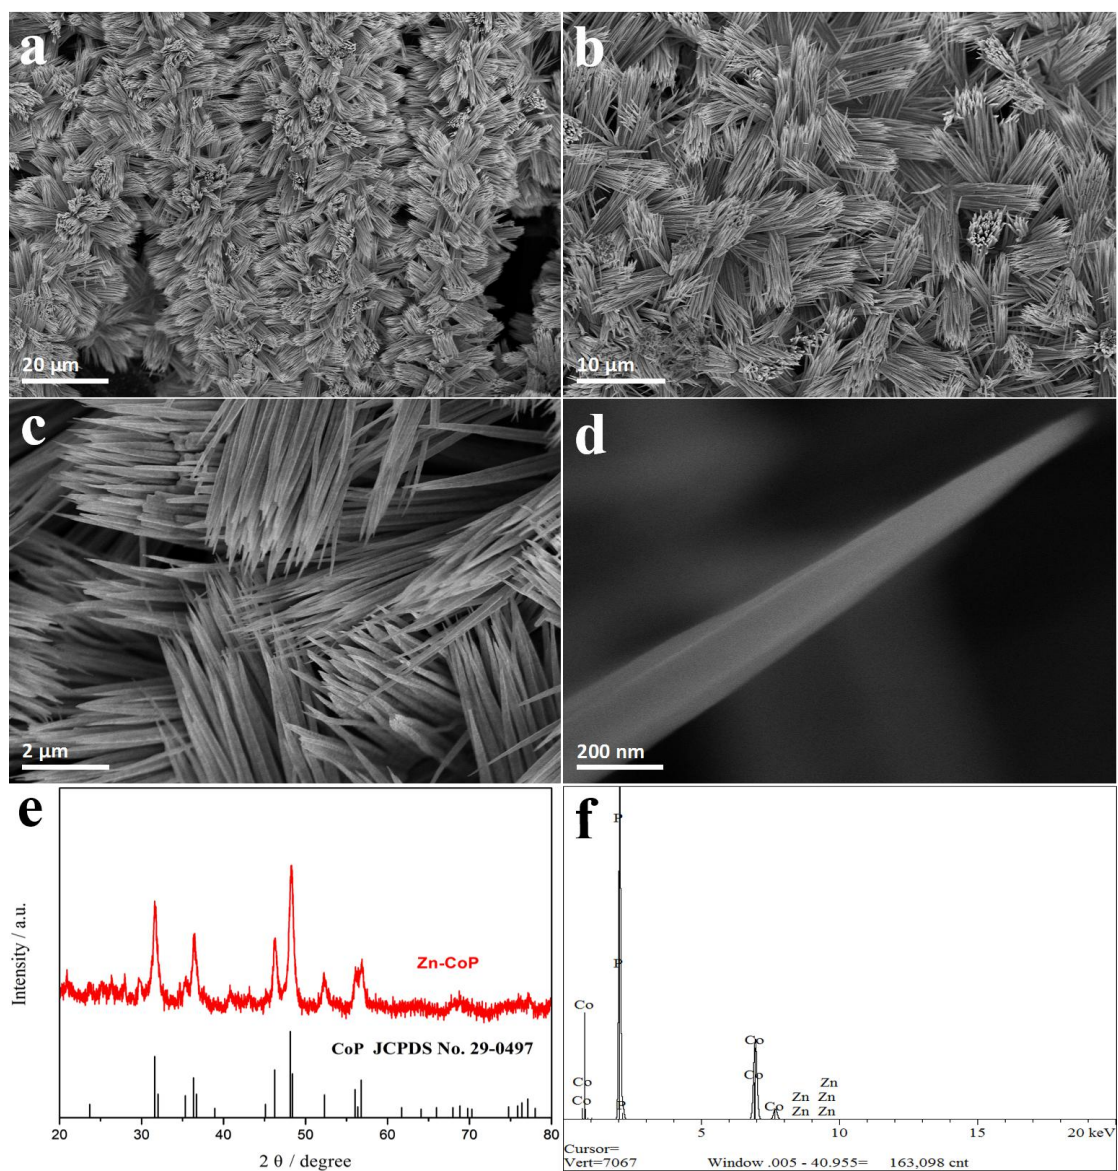

**Figure S8.** (a,b) Low-magnification and (c,d) high-magnification SEM images, (e) XRD pattern, and (f) EDX pattern of Zn-CoP NRCs/CP.



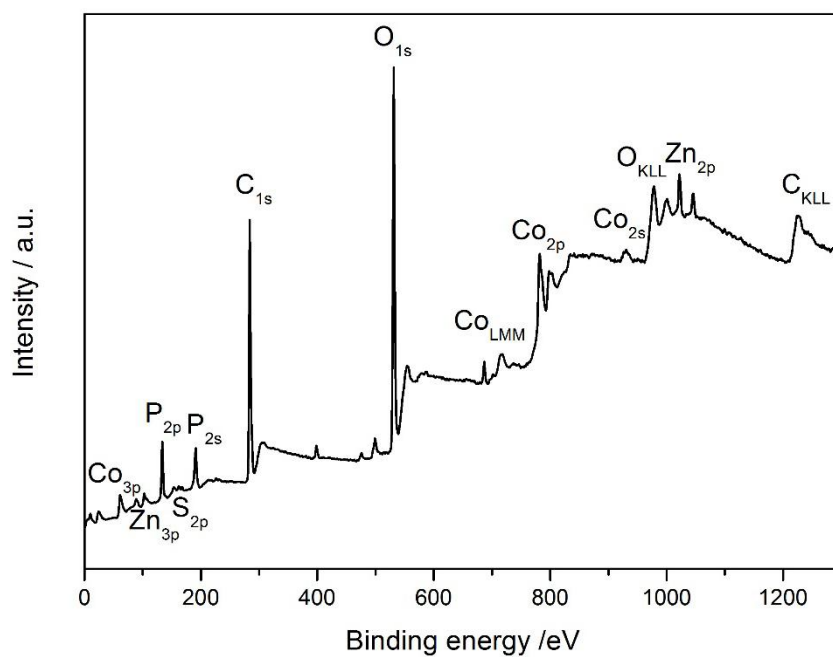

**Figure S9.** XPS survey spectrum of  $\text{Zn}_{0.075}\text{S-Co}_{0.925}\text{P}$  NRCs/CP.

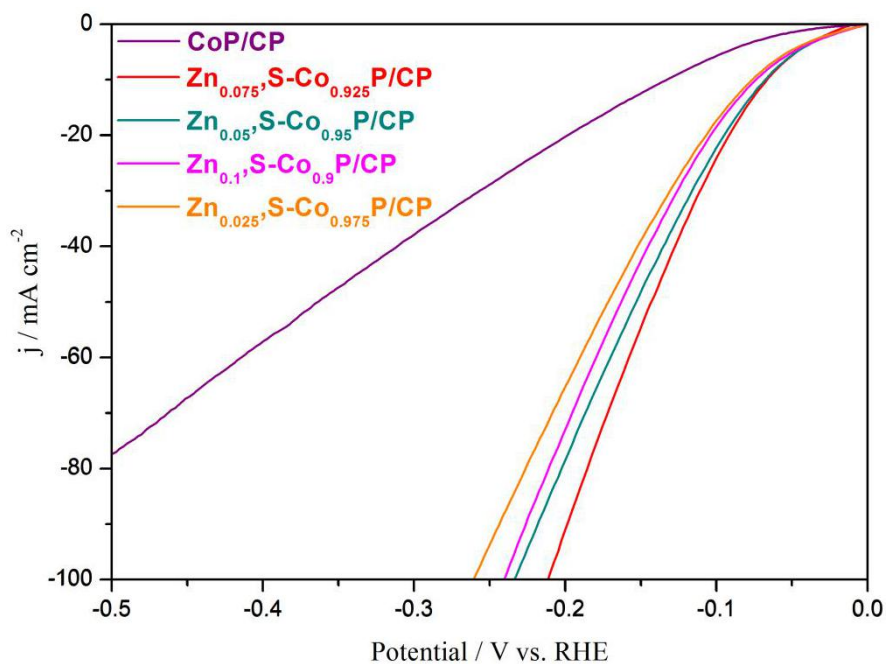

**Figure S10.** HER performances of the  $\text{Zn}_x\text{S-Co}_{1-x}\text{P}$  NRCs/CP ( $x = 0.025, 0.05, 0.075,$  and  $0.1$ ) in 1.0 M PBS.

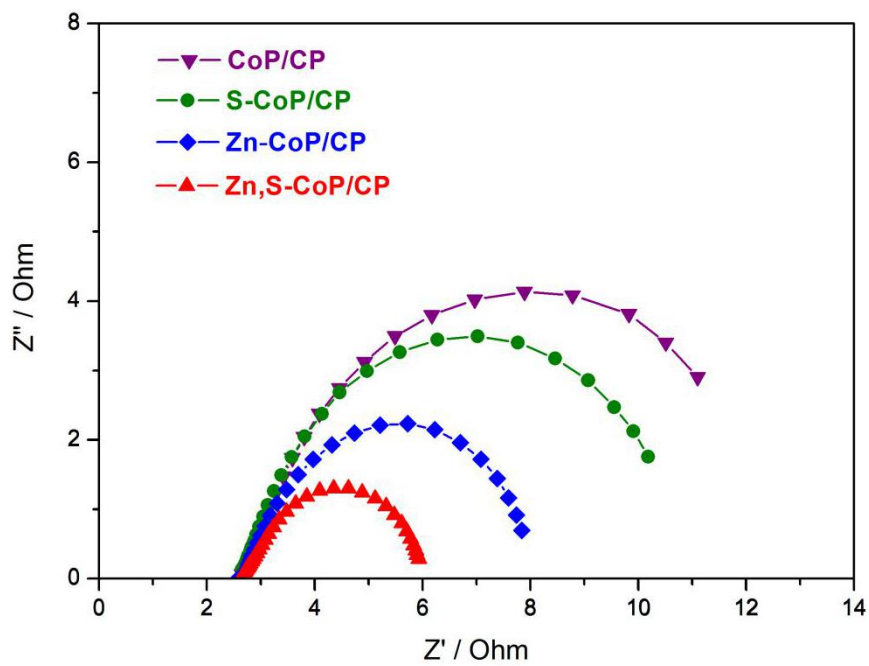

**Figure S11.** EIS Nyquist plots of the pure CoP, S-CoP,  $Zn_{0.075}\text{-}Co_{0.925}P$ , and  $Zn_{0.075},S\text{-}Co_{0.925}P$  NRCs/CP for HER test in 1.0 M PBS.

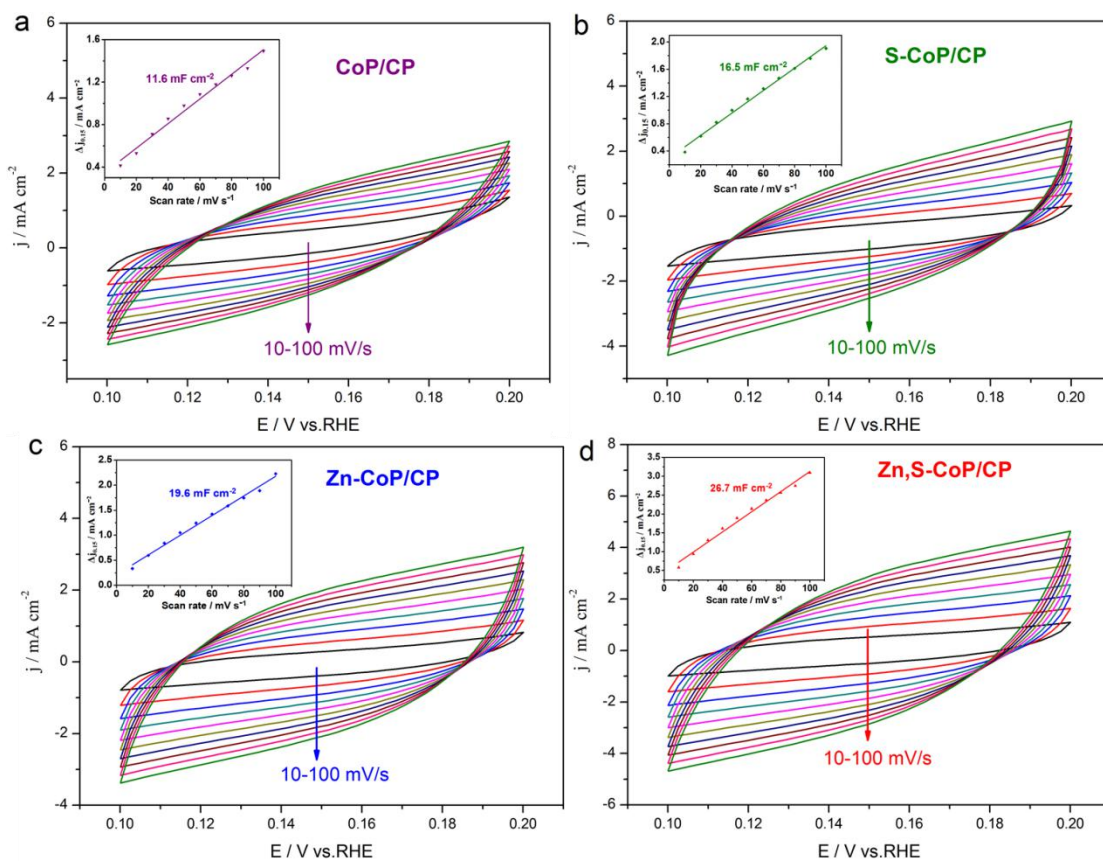

**Figure S12.** CVs of (a) CoP NRCs /CP, (b) S-CoP NRCs/CP, (c) Zn<sub>0.075</sub>-Co<sub>0.925</sub>P, and (d) Zn<sub>0.075</sub>,S-Co<sub>0.925</sub>P NRCs/CP at different scan rates in 1.0 M PBS, and the inset is the corresponding linear fitting curves of the capacitive currents as a function of scan rates.

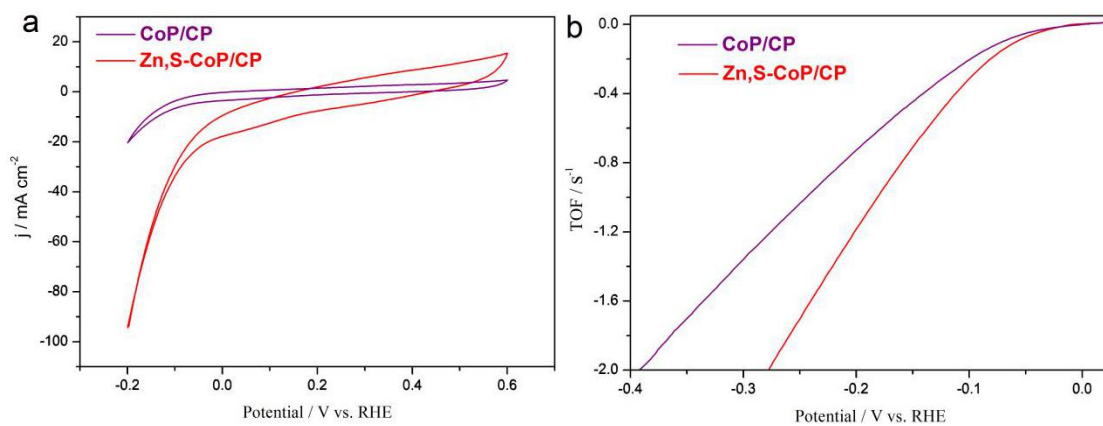

**Figure S13.** (a) CV curves of CoP NRCs /CP and Zn<sub>0.025</sub>S-Co<sub>0.975</sub>P NRCs/CP in 1.0 M PBS at a scan rate of 50 mV/s. (b) Calculated TOF of CoP NRCs/CP and Zn<sub>0.025</sub>S-Co<sub>0.975</sub>P NRCs/CP.

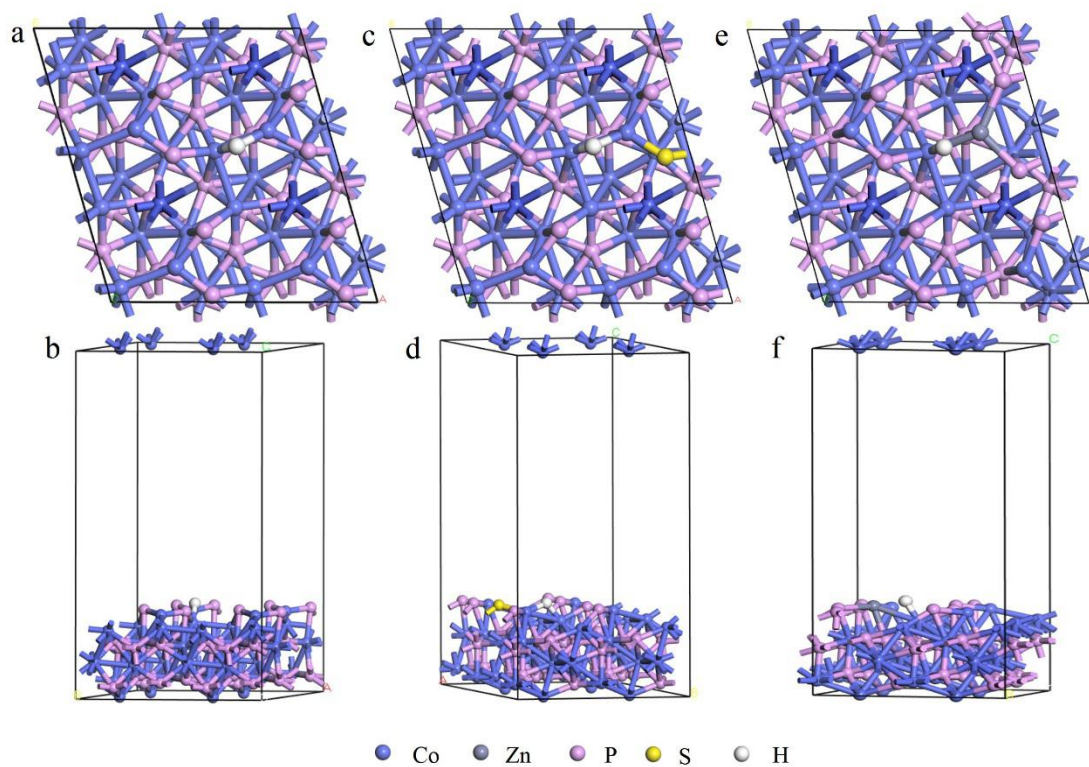

**Figure S14.** Top and side views of geometric configurations of H adsorption onto the (a,b) pristine CoP (111), (c,d) S-CoP (111), and (e,f) Zn-CoP (111) surfaces.

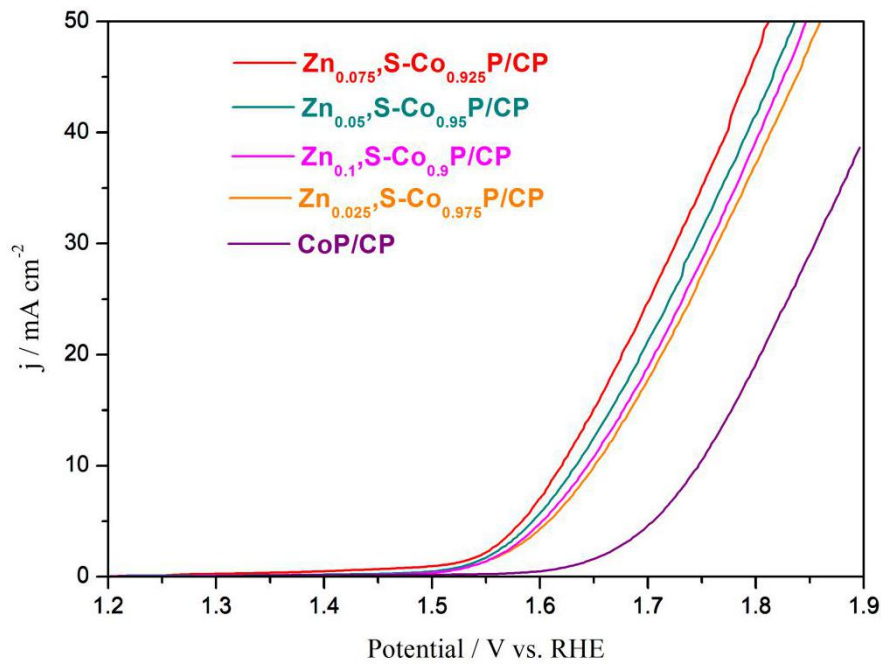

**Figure S15.** OER performances of the  $Zn_xS-Co_{1-x}P$  NRCs/CP ( $x = 0, 0.025, 0.05, 0.075, \text{ and } 0.1$ ) in 1.0 M PBS.

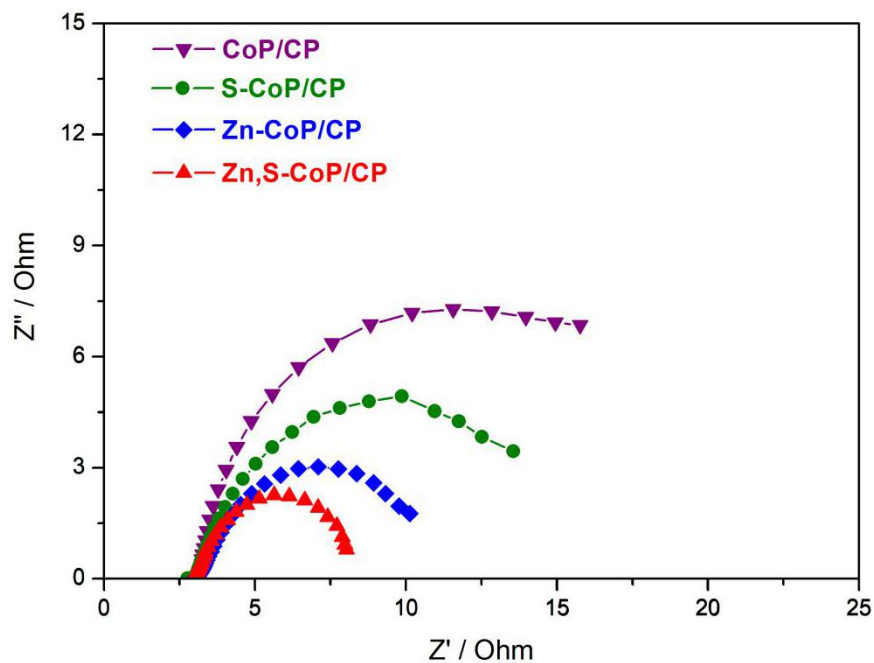

**Figure S16.** EIS Nyquist plots of the pure CoP, S-CoP,  $Zn_{0.075}-Co_{0.925}P$ , and  $Zn_{0.075}S-Co_{0.925}P$  NRCs/CP for OER test in 1.0 M PBS.

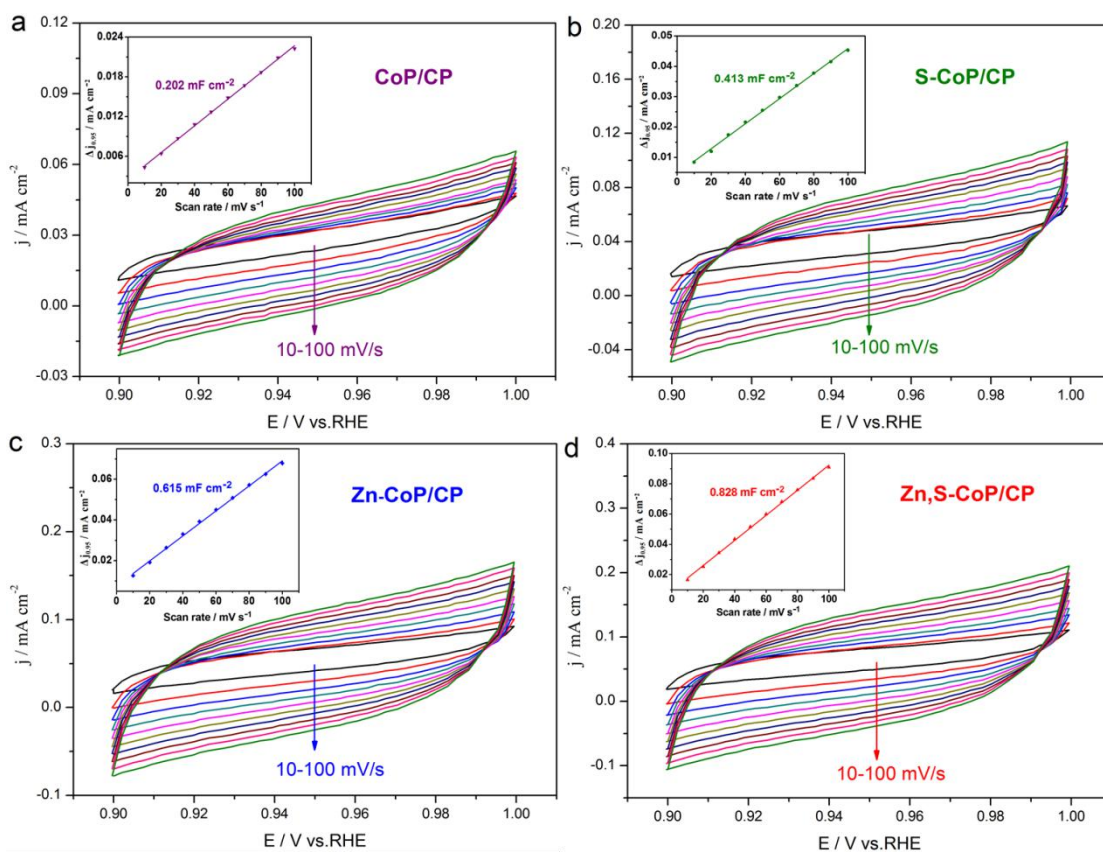

**Figure S17.** Electrochemical double-layer capacitance measurements at different scan rates for OER. CVs for (a) CoP NRCs /CP, (b) S-CoP NRCs/CP, (c) Zn<sub>0.075</sub>-Co<sub>0.925</sub>P NRCs/CP, and (d) Zn<sub>0.075</sub>,S-Co<sub>0.925</sub>P NRCs/CP at different scan rates in 1.0 M PBS, and the inset is the corresponding linear fitting curves of the capacitive currents as a function of scan rates.

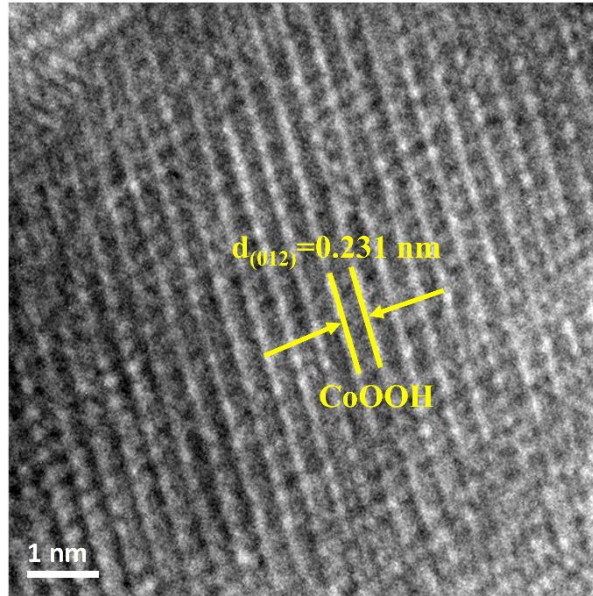

**Figure S18.** HRTEM image of Zn<sub>0.075</sub>S-Co<sub>0.925</sub>P NRCs/CP after OER test in 1.0 M PBS.

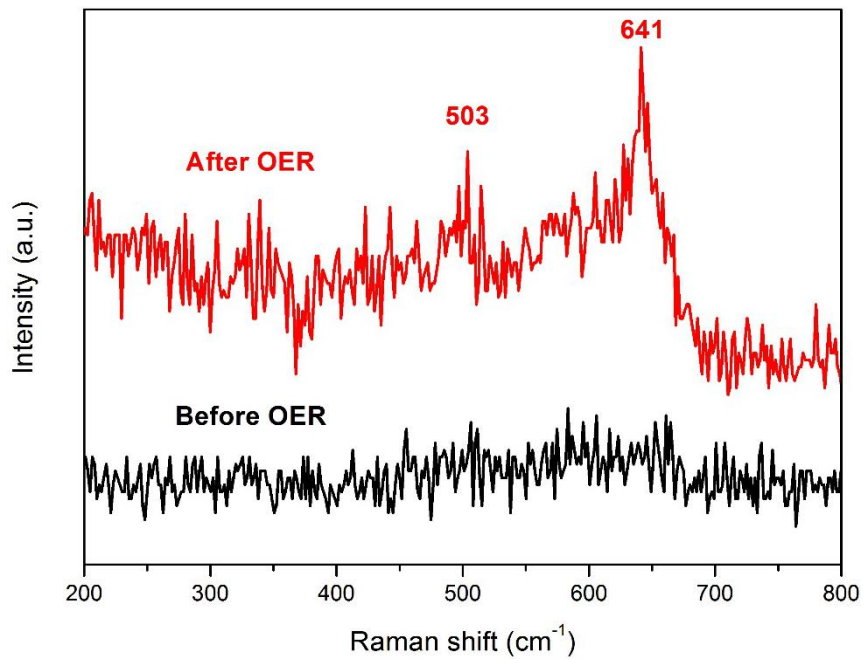

**Figure S19.** Raman spectra of Zn<sub>0.075</sub>S-Co<sub>0.925</sub>P NRCs/CP before and after OER test.



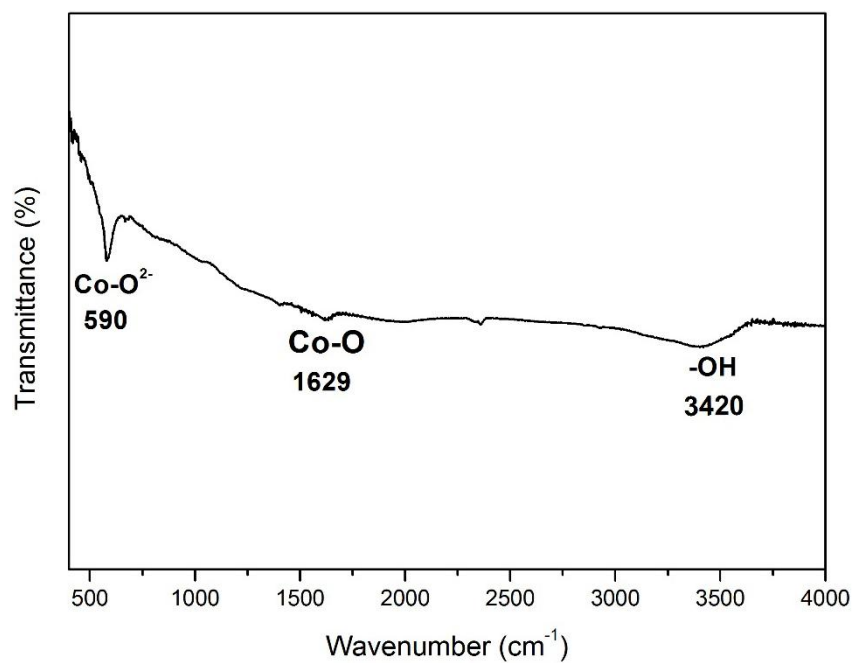

**Figure S20.** FTIR spectra of Zn<sub>0.075</sub>S-Co<sub>0.925</sub>P NRCs/CP after OER test in 1.0 M PBS.

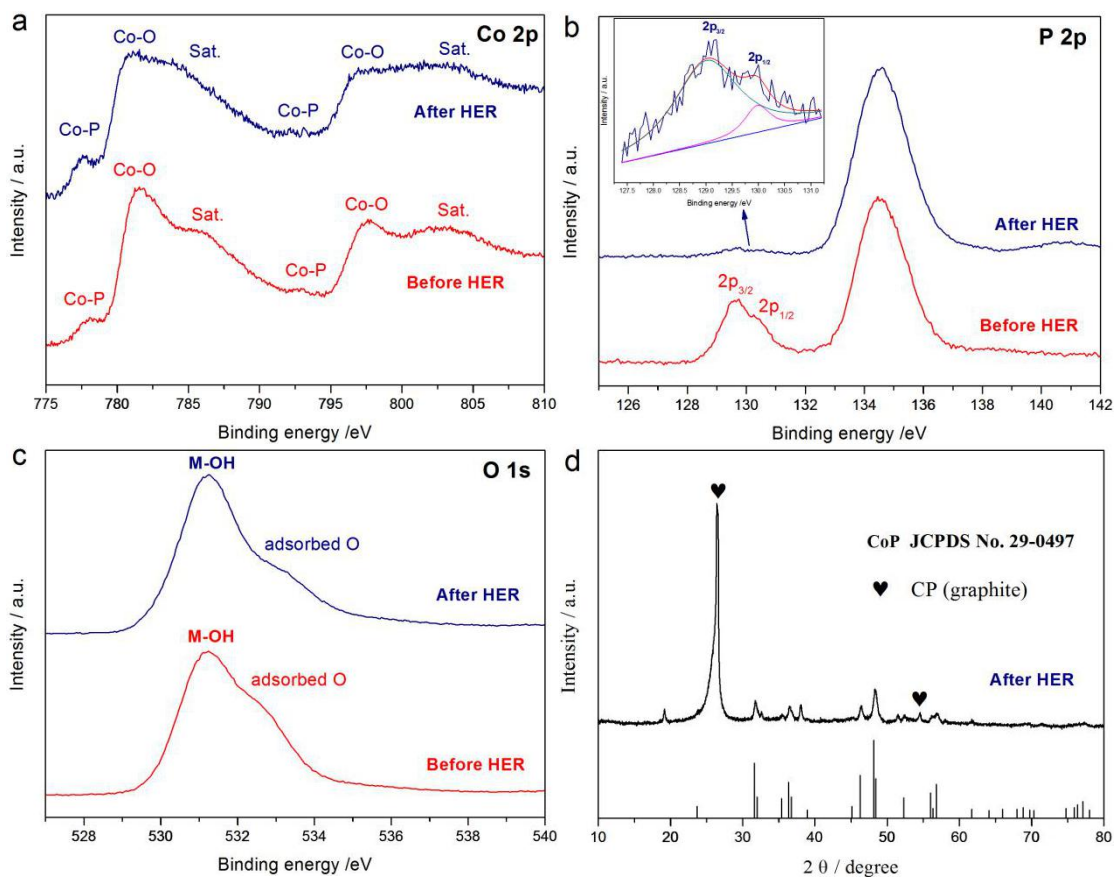

**Figure S21.** (a) Co 2p, (b) P 2p, and (c) O 1s XPS spectra of Zn<sub>0.075</sub>S-Co<sub>0.925</sub>P NRCs/CP before and after HER test. (d) XRD pattern of Zn<sub>0.075</sub>S-Co<sub>0.925</sub>P NRCs/CP after HER test.

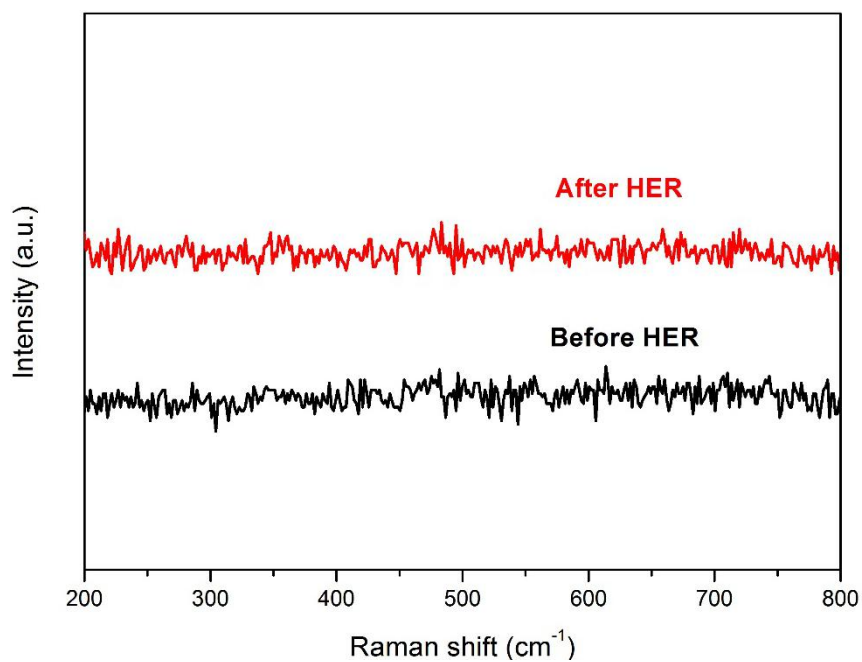

**Figure S22.** Raman spectra of Zn<sub>0.075</sub>S-Co<sub>0.925</sub>P NRCs/CP before and after HER test.

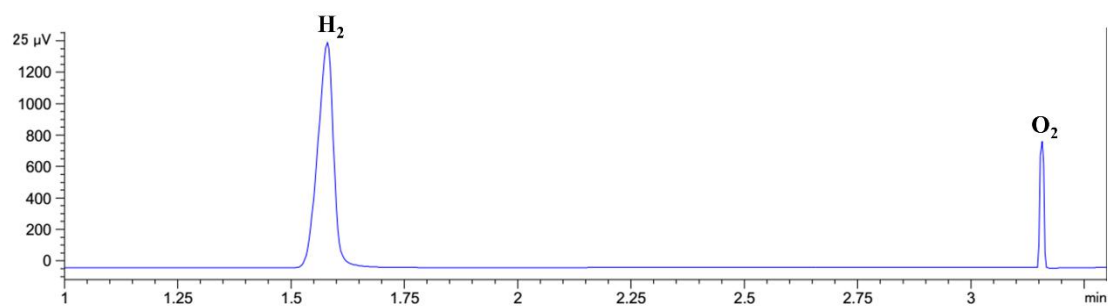

**Figure S23.** GC signals of the gas generated from water splitting.

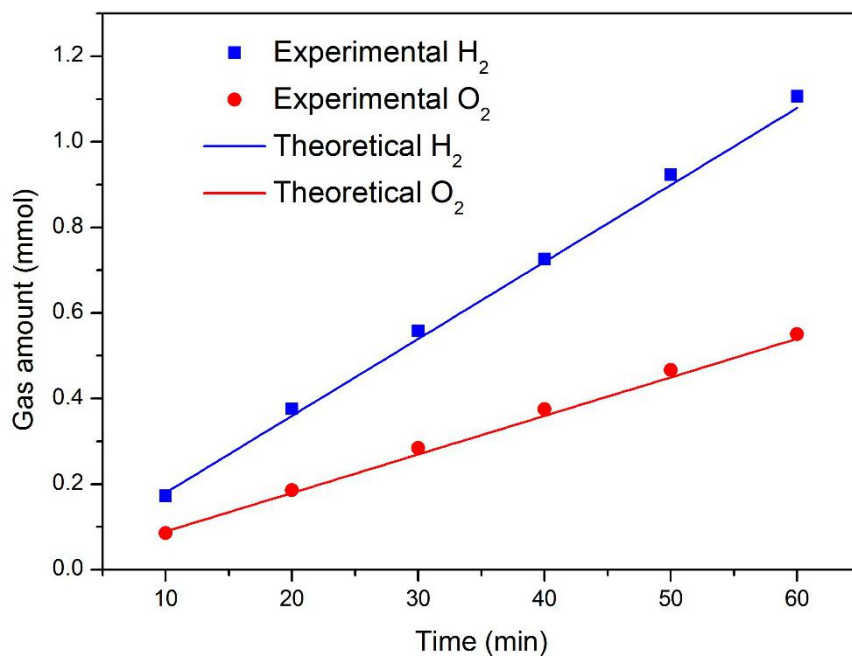

**Figure S24.** The amount of gas theoretical calculation and experimental measure versus time for HER and OER of Zn<sub>0.075</sub>S-Co<sub>0.925</sub>P NRCs/CP.

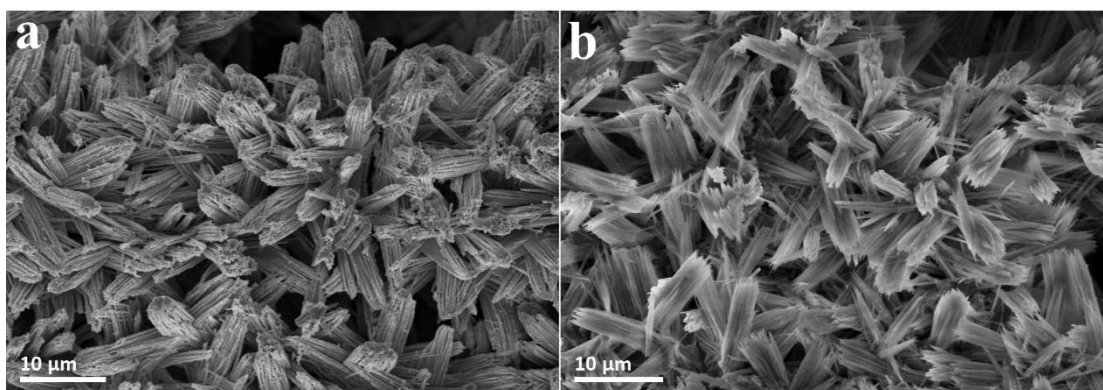

**Figure S25.** SEM images of the Zn<sub>0.075</sub>S-Co<sub>0.925</sub>P NRCs/CP after (a) HER and (b) OER test.

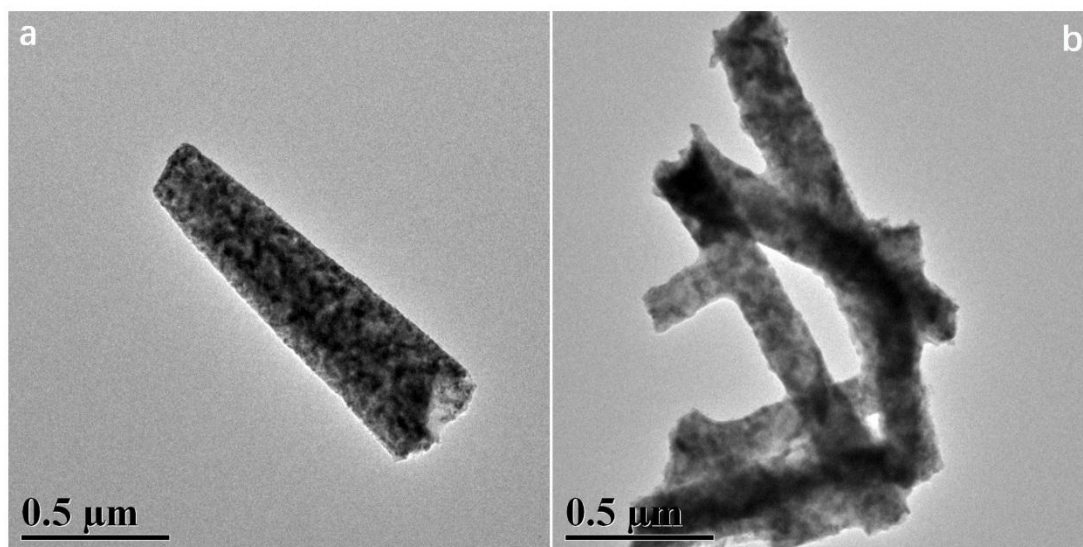

**Figure S26.** TEM images of the  $\text{Zn}_{0.075}\text{S-Co}_{0.925}\text{P}$  NRCs/CP after (a) HER and (b) OER test.

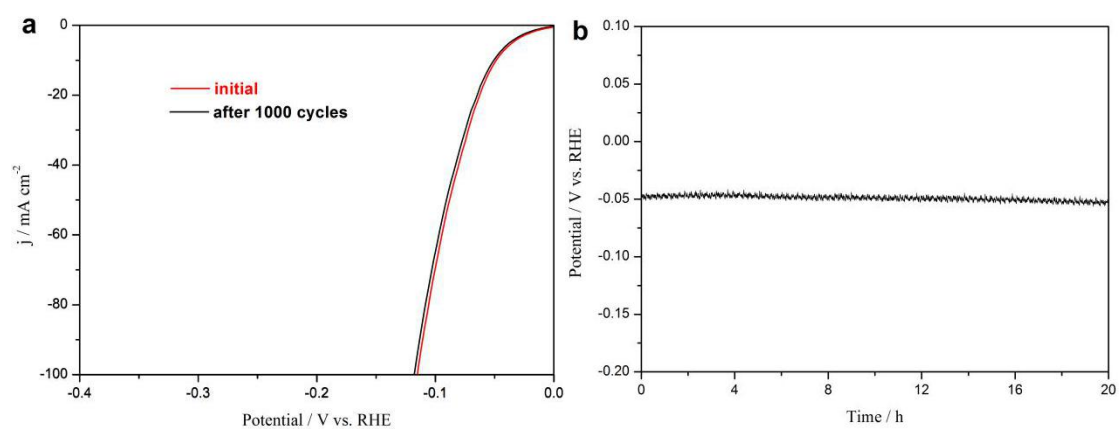

**Figure S27.** Alkaline HER performance. (a) LSV curves of  $\text{Zn}_{0.075}\text{S-Co}_{0.925}\text{P}$  NRCs/CP before and after 1000 CV cycles. (b) Chronopotentiometry curve of  $\text{Zn}_{0.075}\text{S-Co}_{0.925}\text{P}$  NRCs/CP at a constant current density of  $10 \text{ mA cm}^{-2}$ .

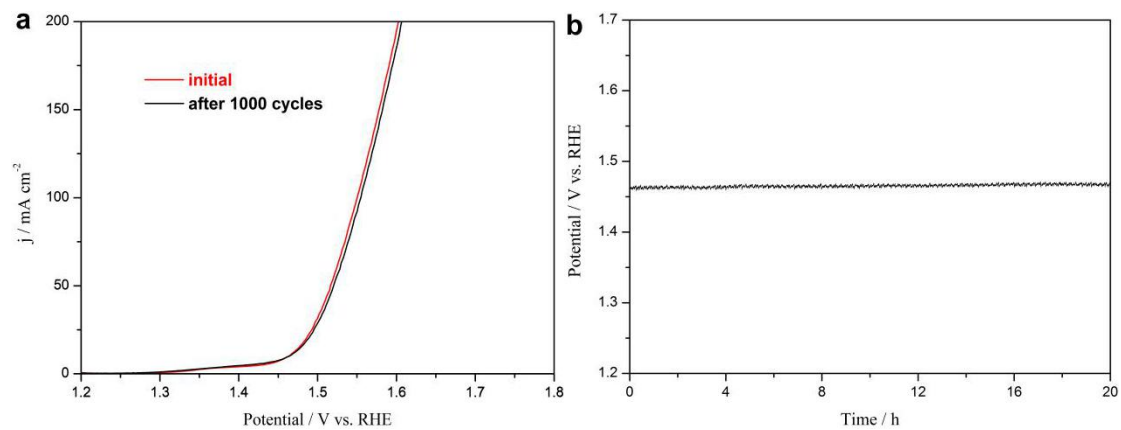

**Figure S28.** Alkaline OER performance. (a) LSV curves of  $\text{Zn}_{0.075}\text{S-Co}_{0.925}\text{P}$  NRCs/CP before and after 1000 CV cycles. (d) Chronopotentiometry curve of  $\text{Zn}_{0.075}\text{S-Co}_{0.925}\text{P}$  NRCs/CP at a constant current density of  $10 \text{ mA cm}^{-2}$ .

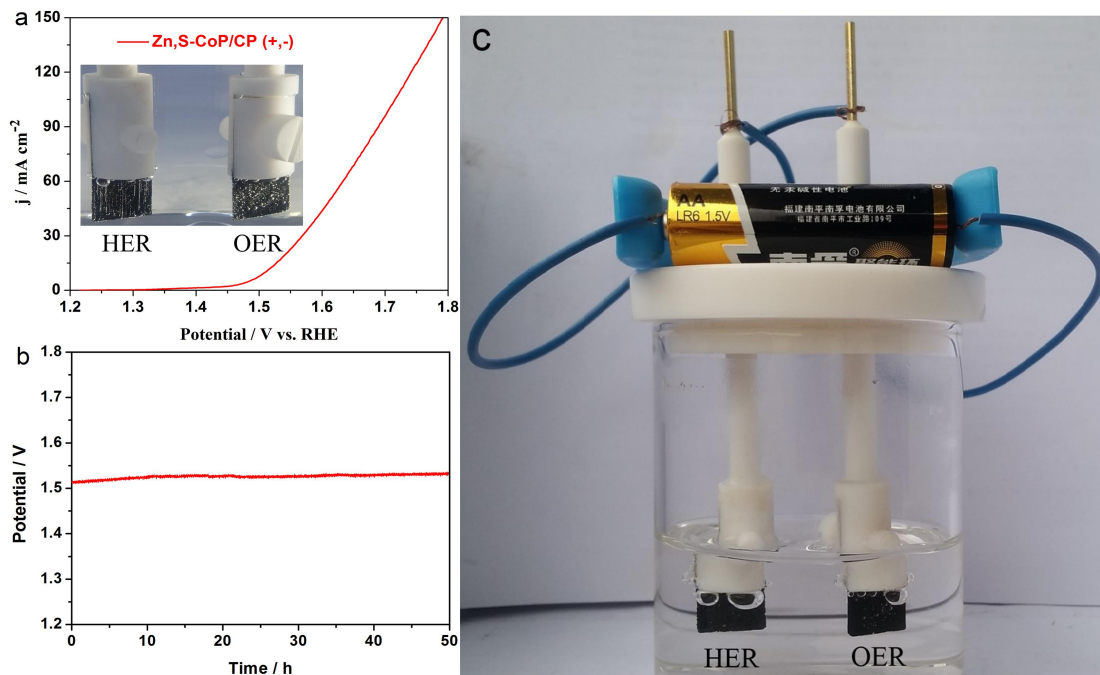

**Figure S29.** (a) LSV curves of Zn<sub>0.075</sub>S-Co<sub>0.925</sub>P NRCs/CP used as both cathode and anode in a two-electrode configuration in 1.0 M KOH, and the inset is the device photograph of the two-electrode electrolyzer. (b) Chronopotentiometry curves of Zn<sub>0.075</sub>S-Co<sub>0.925</sub>P NRCs/CP (+,-) at a constant current density of 10 mA cm<sup>-2</sup>. (c) Optical image of the Zn<sub>0.075</sub>S-Co<sub>0.925</sub>P NRCs/CP (+,-) electrolyzer powered by an AA battery and H<sub>2</sub> (left) and O<sub>2</sub> (right) bubbles formed during water electrolysis.

**Table S1.** ICP-OES analysis results of the element content of Zn, Co, P, and S for Zn<sub>x</sub>S-Co<sub>1-x</sub>P.

| Sample                                      | Zn at% | Co at% | P at% | S at% | Zn <sup>2+</sup> /(Zn <sup>2+</sup> +Co <sup>2+</sup> ) |
|---------------------------------------------|--------|--------|-------|-------|---------------------------------------------------------|
| CoP                                         | 0      | 49.81  | 50.19 | 0     | 0                                                       |
| S-CoP                                       | 0      | 49.86  | 45.20 | 4.94  | 0                                                       |
| Zn <sub>0.075</sub> S-Co <sub>0.925</sub> P | 3.69   | 46.18  | 50.13 | 0     | 0.0740                                                  |
| Zn <sub>0.025</sub> S-Co <sub>0.975</sub> P | 1.16   | 48.05  | 45.82 | 4.97  | 0.0236                                                  |
| Zn <sub>0.05</sub> S-Co <sub>0.95</sub> P   | 2.45   | 47.48  | 45.15 | 4.92  | 0.0491                                                  |
| Zn <sub>0.075</sub> S-Co <sub>0.925</sub> P | 3.66   | 45.97  | 45.42 | 4.95  | 0.0737                                                  |
| Zn <sub>0.1</sub> S-Co <sub>0.9</sub> P     | 4.93   | 44.92  | 45.24 | 4.91  | 0.0989                                                  |

**Table S2.** HER performance of the  $Zn_{0.075}S-Co_{0.925}P$  NRCs/CP in this work, in comparison with other non-noble metal based catalysts in 1.0 M PBS from recent publications.

| Catalysts                                  | $\eta$ (mV) at<br>10 mA cm <sup>-2</sup> | Tafel slope<br>mV dec <sup>-1</sup> | References                                                   |
|--------------------------------------------|------------------------------------------|-------------------------------------|--------------------------------------------------------------|
| CoP/CC                                     | 106                                      | 93                                  | <i>J. Am. Chem. Soc.</i> <b>2014</b> , <i>136</i> , 7587     |
| CoP/Ti                                     | 149                                      | 111                                 | <i>Chem. Mater.</i> <b>2014</b> , <i>26</i> , 4326           |
| CoP-MNA/NF                                 | ~180*                                    | 189                                 | <i>Adv. Funct. Mater.</i> <b>2015</b> , <i>25</i> , 7337     |
| NiCoP/rGO                                  | 124                                      | 91                                  | <i>Adv. Funct. Mater.</i> <b>2016</b> , <i>26</i> , 6785     |
| Co <sub>0.6</sub> Fe <sub>0.4</sub> P/CNTs | 105                                      | 78                                  | <i>Adv. Funct. Mater.</i> <b>2017</b> , <i>27</i> , 1606635  |
| Co/CoP-5                                   | 138                                      | 72.3                                | <i>Adv. Energy Mater.</i> <b>2017</b> , <i>7</i> , 1602355   |
| Mn-Co-P/Ti                                 | 86                                       | 82                                  | <i>ACS Catal.</i> <b>2017</b> , <i>7</i> , 98                |
| NiCo <sub>2</sub> P <sub>x</sub> /CF       | 63                                       | 63.3                                | <i>Adv. Mater.</i> <b>2017</b> , <i>29</i> , 1605502         |
| CoP@BCN-1                                  | 122                                      | 59                                  | <i>Adv. Energy Mater.</i> <b>2017</b> , <i>7</i> , 1601671   |
| MoP NWAs/CFP                               | 84                                       | 63                                  | <i>Adv. Funct. Mater.</i> <b>2018</b> , <i>28</i> , 1804600  |
| Ni <sub>2</sub> P@NPCNFs                   | 185.3                                    | 230.3                               | <i>Angew. Chem. Int. Ed.</i> <b>2018</b> , <i>57</i> , 1963  |
| PdP <sub>2</sub> @CB                       | 84.6                                     | 72.3                                | <i>Angew. Chem. Int. Ed.</i> <b>2018</b> , <i>57</i> , 1     |
| Ni <sub>2</sub> P@NPCNFs                   | 185.3                                    | 230.3                               | <i>Angew. Chem. Int. Ed.</i> <b>2018</b> , <i>57</i> , 1963  |
| Ni <sub>0.1</sub> Co <sub>0.9</sub> P/CFP  | 125                                      | 103                                 | <i>Angew. Chem. Int. Ed.</i> <b>2018</b> , <i>57</i> , 15445 |
| CoP/Co-MOF                                 | 49                                       | 63                                  | <i>Angew. Chem. Int. Ed.</i> <b>2019</b> , <i>58</i> , 4679  |
| CoP/NiCoP/NC                               | 123                                      | 78                                  | <i>Adv. Funct. Mater.</i> <b>2019</b> , <i>29</i> , 1807976  |
| Co-Fe-P nanotubes                          | 138                                      | 138                                 | <i>Nano Energy</i> <b>2019</b> , <i>56</i> , 225             |
| CoP@PC-750                                 | 85                                       | 58                                  | <i>Small</i> <b>2019</b> , <i>15</i> , 1900550               |
| N-Co <sub>2</sub> P/CC                     | 42                                       | 68                                  | <i>ACS Catal.</i> <b>2019</b> , <i>9</i> , 3744              |
| Ni-FeP/C                                   | 117                                      | 70                                  | <i>Sci. Adv.</i> <b>2019</b> , <i>5</i> , eaav6009           |
| Zn <sub>3</sub> S-CoP/CP                   | 67                                       | 71.6                                | This work                                                    |

\*: In 0.5 M PBS.



**Table S3.** OER performance of the  $Zn_{0.075}S-Co_{0.925}P$  NRCs/CP in this work, in comparison with other non-noble metal based catalysts in neutral solution from recent publications.

| Catalysts                                            | Electrolyte | $\eta$ (mV) at<br>10 mA cm <sup>-2</sup> | Tafel slope<br>mV dec <sup>-1</sup> | References                                                   |
|------------------------------------------------------|-------------|------------------------------------------|-------------------------------------|--------------------------------------------------------------|
| Co-P-B/rGO                                           | 0.1 M PBS   | 400                                      | 68                                  | <i>J. Mater. Chem. A</i> <b>2014</b> , 2,18420               |
| Co <sub>3</sub> S <sub>4</sub><br>nanosheets         | 1.0 M PBS   | 650 mV@<br>3.27 mA cm <sup>-2</sup>      | —                                   | <i>Angew. Chem. Int. Ed.</i> <b>2015</b> , 54,<br>11231      |
| Mn <sub>5</sub> O <sub>8</sub> NPs                   | 0.3 M PBS   | 580 mV@<br>5 mA cm <sup>-2</sup>         | 78.7                                | <i>ACS Catal.</i> <b>2015</b> , 5, 4624                      |
| LT-LiCoO <sub>2</sub>                                | 1.0 M PBS   | 570                                      | 75                                  | <i>Energy Environ. Sci.</i> <b>2016</b> , 9,184              |
| Ni42-300                                             | 0.1 M PBS   | 620                                      | 198.16                              | <i>Adv. Funct. Mater.</i> <b>2016</b> , 26, 6402             |
| Co-Bi NS/G                                           | 1.0 M PBS   | 570 mV@<br>14.4 mA cm <sup>-2</sup>      | 160                                 | <i>Angew. Chem. Int. Ed.</i> <b>2016</b> , 55,<br>2488       |
| CoO/CoSe <sub>2</sub> /Ti                            | 0.5 M PBS   | 510                                      | 137                                 | <i>Adv. Sci.</i> <b>2016</b> , 3, 1500426                    |
| S-NiFe <sub>2</sub> O <sub>4</sub> /NF               | 1.0 M PBS   | 494                                      | 118.1                               | <i>Nano Energy</i> <b>2017</b> , 40, 264                     |
| Ti@Co <sub>0.85</sub> Se                             | 1.0 M PBS   | 500                                      | 153                                 | <i>Nano Energy</i> <b>2017</b> , 39, 321                     |
| Mn-Co-Bi/CC                                          | 1.0 M PBS   | 366                                      | 193                                 | <i>J. Mater. Chem. A</i> <b>2017</b> , 5, 12091              |
| Co-Bi/Ti                                             | 0.1 M K-Bi  | 469                                      | 131                                 | <i>J. Mater. Chem. A</i> <b>2017</b> , 5, 7305               |
| FeNi-P/NF-A                                          | 0.1 M PBS   | 429                                      | 136                                 | <i>J. Mater. Chem. A</i> <b>2017</b> , 5, 13329              |
| Co-Pi NA/Ti                                          | 1.0 M PBS   | 380                                      | 187                                 | <i>Angew. Chem. Int. Ed.</i> <b>2017</b> , 56,1064           |
| A-CoS <sub>4.6</sub> O <sub>0.6</sub><br>PNCs        | 0.1 M PBS   | 570 mV@<br>4.59 mA cm <sup>-2</sup>      | 164                                 | <i>Angew. Chem. Int. Ed.</i> <b>2017</b> , 56,4858           |
| Ni <sub>3</sub> Se <sub>4</sub> /Ni                  | 1.0 M PBS   | 480                                      | 116                                 | <i>ACS Appl. Mater. Interfaces</i> <b>2017</b> ,<br>9, 8714  |
| Co/CoP-5                                             | 1.0 M PBS   | 570 mV@<br>2.64 mA cm <sup>-2</sup>      | —                                   | <i>Adv. Energy Mater.</i> <b>2017</b> , 7,<br>1602355        |
| Co-Se-S-O                                            | 0.1 M PBS   | 480                                      | —                                   | <i>ACS Appl. Mater. Interfaces</i> <b>2018</b> ,<br>10, 8231 |
| Ni <sub>0.1</sub> Co <sub>0.9</sub> P-CFP            | 1.0 M PBS   | 560                                      | 133                                 | <i>Angew. Chem. Int. Ed.</i> <b>2018</b> , 57,15445          |
| CoO/Co <sub>4</sub> N                                | 1.0 M PBS   | 398                                      | 83                                  | <i>J. Mater. Chem. A</i> <b>2018</b> , 6, 24767              |
| CoIr-0.2                                             | 1.0 M PBS   | 373                                      | 117.5                               | <i>Adv. Mater.</i> <b>2018</b> , 30, 1707522                 |
| CoP@NPMG                                             | 1.0 M PBS   | 379                                      | 72                                  | <i>Nanoscale</i> <b>2018</b> , 10, 2603                      |
| NC-CNT/CoP-N                                         | 1.0 M PBS   | 420                                      | —                                   | <i>J. Mater. Chem. A</i> <b>2018</b> , 6, 9009               |
| np-Co <sub>9</sub> S <sub>4</sub> P <sub>4</sub>     | 1.0 M PBS   | 570 mV@<br>25.9 mA cm <sup>-2</sup>      | 106                                 | <i>ACS Appl. Mater. Interfaces</i> <b>2019</b> ,<br>11, 3880 |
| Ni(S <sub>0.5</sub> Se <sub>0.5</sub> ) <sub>2</sub> | 1.0 M PBS   | 501                                      | 94                                  | <i>J. Mater. Chem. A</i> <b>2019</b> , 7, 16793              |
| Zn,S-CoP/CP                                          | 1.0 M PBS   | 391                                      | 99.7                                | This work                                                    |

**Table S4.** Comparison of overall water-splitting performance of Zn<sub>0.075</sub>S-Co<sub>0.925</sub>P NRCs/CP and other non-noble metal bifunctional electrocatalysts in neutral media.

| Catalysts                                            | Electrolyte | E (V)@10 mA cm <sup>-2</sup> | References                                           |
|------------------------------------------------------|-------------|------------------------------|------------------------------------------------------|
| CoO/CoSe <sub>2</sub> -Ti                            | 0.5 M PBS   | 2.18                         | <i>Adv. Sci.</i> <b>2016</b> , 3, 1500426            |
| CoP NA/CC                                            | 1.0 M PBS   | 1.6 @ 2 mA cm <sup>-2</sup>  | <i>ChemElectroChem</i> <b>2017</b> , 4, 1840         |
| S-NiFe <sub>2</sub> O <sub>4</sub> /NF               | 1.0 M PBS   | 1.95                         | <i>Nano Energy</i> <b>2017</b> , 40, 264             |
| Fe-CoP/CC                                            | 0.1 M K-Bi  | 1.95                         | <i>ChemSusChem</i> <b>2017</b> , 10, 3188            |
| CoO/Co <sub>4</sub> N                                | 1.0 M PBS   | 1.79                         | <i>J. Mater. Chem. A</i> <b>2018</b> , 6, 24767      |
| CoP@NPMG                                             | 1.0 M PBS   | 1.74                         | <i>Nanoscale</i> <b>2018</b> , 10, 2603              |
| Ni <sub>0.1</sub> Co <sub>0.9</sub> P/CP             | 1.0 M PBS   | 1.89                         | <i>Angew. Chem. Int. Ed.</i> <b>2018</b> , 57, 15445 |
| PdP <sub>2</sub> @CB                                 | 1.0 M PBS   | 1.59                         | <i>Angew. Chem. Int. Ed.</i> <b>2018</b> , 57, 1     |
| NC-CNT/CoP-N                                         | 1.0 M PBS   | 1.69                         | <i>J. Mater. Chem. A</i> <b>2018</b> , 6, 9009       |
| Ni(S <sub>0.5</sub> Se <sub>0.5</sub> ) <sub>2</sub> | 1.0 M PBS   | 1.87                         | <i>J. Mater. Chem. A</i> <b>2019</b> , 7, 16793      |
| CoMnNiS-NF-31                                        | 1.0 M PBS   | 1.80                         | <i>J. Am. Chem. Soc.</i> <b>2019</b> , 141, 10417    |
| v-CoFe LDH                                           | 1.0 M PBS   | 1.76                         | <i>ACS Energy Lett.</i> <b>2019</b> , 4, 1412        |
| Zn <sub>0.075</sub> S-CoP/CP                         | 1.0 M PBS   | 1.70                         | This work                                            |

**Table S5.** HER performance of the Zn<sub>0.075</sub>S-Co<sub>0.925</sub>P NRCs/CP in this work, in comparison with other non-noble metal based catalysts in 1.0 M KOH from recent publications.

| Catalysts                                                  | $\eta$ (mV) at<br>10 mA cm <sup>-2</sup> | Tafel slope<br>mV dec <sup>-1</sup> | References                                          |
|------------------------------------------------------------|------------------------------------------|-------------------------------------|-----------------------------------------------------|
| CoP/CC                                                     | 209                                      | 129                                 | <i>J. Am. Chem. Soc.</i> <b>2014</b> , 136, 7587    |
| Co-P film                                                  | 94                                       | 42                                  | <i>Angew. Chem. Int. Ed.</i> <b>2015</b> , 54, 6251 |
| CoP NS/C                                                   | 111                                      | 70.9                                | <i>Green Chem.</i> <b>2016</b> , 18, 2287           |
| CoNiP@NF                                                   | 155                                      | 113                                 | <i>J. Mater. Chem. A</i> <b>2016</b> , 4, 10195     |
| np-(Co <sub>0.52</sub> Fe <sub>0.48</sub> ) <sub>2</sub> P | 79                                       | 40                                  | <i>Energy Environ. Sci.</i> <b>2016</b> , 9, 2257   |
| Ni <sub>0.51</sub> Co <sub>0.49</sub> P film               | 82                                       | 43                                  | <i>Adv. Funct. Mater.</i> <b>2016</b> , 26, 7644    |
| CoP@NC                                                     | 129                                      | 58                                  | <i>ACS Catal.</i> <b>2017</b> , 7, 3824             |
| Mn-Co-P/Ti                                                 | 76                                       | 52                                  | <i>ACS Catal.</i> <b>2017</b> , 7, 98               |
| Ce-CoP NWs/Ti                                              | 92                                       | 63.5                                | <i>Nano Energy</i> <b>2017</b> , 38, 290            |
| Fe-CoP/Ti                                                  | 78                                       | 75                                  | <i>Adv. Mater.</i> <b>2017</b> , 29, 1602441        |
| CoMoP@C                                                    | 81                                       | 55.5                                | <i>Energy Environ. Sci.</i> <b>2017</b> , 10, 788   |
| Ni-Co-P HNBS                                               | 107                                      | 46                                  | <i>Energy Environ. Sci.</i> <b>2018</b> , 11, 872   |
| Co <sub>0.93</sub> Ni <sub>0.07</sub> P <sub>3</sub> /CC   | 87                                       | 60.7                                | <i>ACS Energy Lett.</i> <b>2018</b> , 3, 1744       |
| CoP/NCNHP                                                  | 115                                      | 66                                  | <i>J. Am. Chem. Soc.</i> <b>2018</b> , 140, 2610    |
| CoP@3D MXene                                               | 168                                      | 58                                  | <i>ACS Nano</i> <b>2018</b> , 12, 8017              |
| Co-Fe-P nanotubes                                          | 86                                       | 66                                  | <i>Nano Energy</i> <b>2019</b> , 56, 225            |
| Ni-CoP/HPFs                                                | 92                                       | 71                                  | <i>Nano Energy</i> <b>2019</b> , 56, 411            |
| Co-P@PC-750                                                | 76                                       | 52                                  | <i>Small</i> <b>2019</b> , 15, 1900550              |
| Er-doped CoP                                               | 66                                       | 61                                  | <i>J. Mater. Chem. A</i> <b>2019</b> , 7, 5769      |
| N-Co <sub>2</sub> P/CC                                     | 34                                       | 51                                  | <i>ACS Catal.</i> <b>2019</b> , 9, 3744             |
| CoP/Co-MOF                                                 | 34                                       | 56                                  | <i>Angew. Chem. Int. Ed.</i> <b>2019</b> , 58, 4679 |
| CoP/NiCoP/NC                                               | 75                                       | 64                                  | <i>Adv. Funct. Mater.</i> <b>2019</b> , 29, 1807976 |
| Zn <sub>0.075</sub> S-CoP/CP                               | 49                                       | 41.5                                | This work                                           |

**Table S6.** OER performance of the Zn<sub>0.075</sub>S-Co<sub>0.925</sub>P NRCs/CP in this work, in comparison with other non-noble metal based catalysts in 1.0 M KOH from recent publications.

| Catalysts                                                  | $\eta$ (mV) at<br>10 mA cm <sup>-2</sup> | Tafel slope<br>mV dec <sup>-1</sup> | References                                                     |
|------------------------------------------------------------|------------------------------------------|-------------------------------------|----------------------------------------------------------------|
| CoP-MNA/NF                                                 | 290                                      | 65                                  | <i>Adv. Funct. Mater.</i> <b>2015</b> , <i>25</i> , 7337       |
| Co-P film                                                  | 345                                      | 47                                  | <i>Angew. Chem. Int. Ed.</i> <b>2015</b> , <i>54</i> , 6251    |
| CoP NR/C                                                   | 320                                      | 71                                  | <i>ACS Catal.</i> <b>2015</b> , <i>5</i> , 6874                |
| np-(Co <sub>0.52</sub> Fe <sub>0.48</sub> ) <sub>2</sub> P | 270                                      | 30                                  | <i>Energy Environ. Sci.</i> <b>2016</b> , <i>9</i> , 2257      |
| NiCoP/NF                                                   | 280                                      | 87                                  | <i>Nano Lett.</i> <b>2016</b> , <i>16</i> , 7718               |
| CoMnP nanoparticles                                        | 330                                      | 61                                  | <i>J. Am. Chem. Soc.</i> <b>2016</b> , <i>138</i> , 4006       |
| CoP/rGO                                                    | 340                                      | 66                                  | <i>Chem. Sci.</i> <b>2016</b> , <i>7</i> , 1690                |
| CoP NS/C                                                   | 277                                      | 85.6                                | <i>Green Chem.</i> <b>2016</b> , <i>18</i> , 2287              |
| NiCoP/Ti                                                   | 310                                      | 52                                  | <i>Adv. Mater. Interfaces</i> <b>2016</b> , <i>3</i> , 1500454 |
| NiCoP/C                                                    | 330                                      | 96                                  | <i>Angew. Chem. Int. Ed.</i> <b>2017</b> , <i>56</i> , 3897    |
| Fe-CoP/Ti                                                  | 230                                      | 67                                  | <i>Adv. Mater.</i> <b>2017</b> , <i>29</i> , 1602441           |
| Ni-Co-P HNBS                                               | 270                                      | 76                                  | <i>Energy Environ. Sci.</i> <b>2018</b> , <i>11</i> , 872      |
| Mo-CoOOH/CC                                                | 305                                      | 56                                  | <i>Nano Energy</i> <b>2018</b> , <i>48</i> , 73                |
| S:CoP@NG                                                   | 260                                      | 108                                 | <i>Nano Energy</i> <b>2018</b> , <i>53</i> , 286               |
| CoP/NCNHP                                                  | 310                                      | 70                                  | <i>J. Am. Chem. Soc.</i> <b>2018</b> , <i>140</i> , 2610       |
| CoP@3D MXene                                               | 290                                      | 51                                  | <i>ACS Nano</i> <b>2018</b> , <i>12</i> , 8017                 |
| S:Co <sub>2</sub> P@CC                                     | 290                                      | 82                                  | <i>Chem. Mater.</i> <b>2018</b> , <i>30</i> , 8861             |
| CoP@NPMG                                                   | 276                                      | 54                                  | <i>Nanoscale</i> , <b>2018</b> , <i>10</i> , 2603              |
| Co-P@PC-750                                                | 283                                      | 53                                  | <i>Small</i> <b>2019</b> , <i>15</i> , 1900550                 |
| NieCoP@C                                                   | 279                                      | 54                                  | <i>Nano Energy</i> <b>2019</b> , <i>62</i> , 136               |
| Mo <sub>51</sub> Ni <sub>40</sub> Fe <sub>9</sub> NBS      | 257                                      | 51                                  | <i>ACS Catal.</i> <b>2019</b> , <i>9</i> , 1013                |
| Er-doped CoP                                               | 256                                      | 70                                  | <i>J. Mater. Chem. A</i> <b>2019</b> , <i>7</i> , 5769         |
| Cr-FeNiP/NCN                                               | 240                                      | 72.36                               | <i>Adv. Mater.</i> <b>2019</b> , <i>31</i> , 1900178           |
| Zn,S-CoP/CP                                                | 233                                      | 71.7                                | This work                                                      |

**Table S7.** Summary of recent reported representative of bifunctional non-noble metal based catalysts for overall water-splitting in 1.0 M KOH.

| Catalysts                                                  | Potential (V) at<br>10 mA cm <sup>-2</sup> | References                                                     |
|------------------------------------------------------------|--------------------------------------------|----------------------------------------------------------------|
| Co-P film                                                  | 1.65                                       | <i>Angew. Chem. Int. Ed.</i> <b>2015</b> , <i>54</i> , 6251    |
| CoP-MNA                                                    | 1.62                                       | <i>Adv. Funct. Mater.</i> <b>2015</b> , <i>25</i> , 7337       |
| CoP NR                                                     | 1.587                                      | <i>ACS Catal.</i> <b>2015</b> , <i>5</i> , 6874                |
| np-(Co <sub>0.52</sub> Fe <sub>0.48</sub> ) <sub>2</sub> P | 1.53                                       | <i>Energy Environ. Sci.</i> <b>2016</b> , <i>9</i> , 2257      |
| NiCoP/Ti                                                   | 1.64                                       | <i>Adv. Mater. Interfaces</i> <b>2016</b> , <i>3</i> , 1500454 |
| CoP/GO                                                     | 1.7                                        | <i>Chem. Sci.</i> <b>2016</b> , <i>7</i> , 1690                |
| NiCoP/NF                                                   | 1.58                                       | <i>Nano Lett.</i> <b>2016</b> , <i>16</i> , 7718               |
| Fe-CoP/Ti                                                  | 1.60                                       | <i>Adv. Mater.</i> <b>2017</b> , <i>29</i> , 1602441           |
| Co <sub>4</sub> Ni <sub>1</sub> P NTs                      | 1.59                                       | <i>Adv. Funct. Mater.</i> <b>2017</b> , <i>27</i> , 1703455    |
| Ni-Co-P HNBS                                               | 1.62                                       | <i>Energy Environ. Sci.</i> <b>2018</b> , <i>11</i> , 872      |
| Mo-CoP/CC                                                  | 1.56                                       | <i>Nano Energy</i> <b>2018</b> , <i>48</i> , 73                |
| S:CoP@NF                                                   | 1.617                                      | <i>Nano Energy</i> <b>2018</b> , <i>53</i> , 286               |
| CoP/NCNHP                                                  | 1.64                                       | <i>J. Am. Chem. Soc.</i> <b>2018</b> , <i>140</i> , 2610       |
| Co-P@PC-750                                                | 1.60                                       | <i>Small</i> <b>2019</b> , <i>15</i> , 1900550                 |
| Er-doped CoP                                               | 1.58                                       | <i>J. Mater. Chem. A</i> , <b>2019</b> , <i>7</i> , 5769       |
| Co@N-CS/N-HCP@CC                                           | 1.545                                      | <i>Adv. Energy Mater.</i> <b>2019</b> , <i>9</i> , 1803918     |
| NiFeP/SG                                                   | 1.54                                       | <i>Nano Energy</i> <b>2019</b> , <i>58</i> , 870               |
| CoP@NiFe-OH/SPNF                                           | 1.53                                       | <i>Nano Energy</i> <b>2019</b> , <i>63</i> , 103821            |
| Co <sub>3</sub> S <sub>4</sub> /EC-MOF                     | 1.55                                       | <i>Adv. Mater.</i> <b>2019</b> , <i>31</i> , 1806672           |
| Ni,Zn-CoO NRs                                              | 1.52                                       | <i>Adv. Mater.</i> <b>2019</b> , <i>31</i> , 1807771           |
| Cr-doped FeNi-P/NCN                                        | 1.50                                       | <i>Adv. Mater.</i> <b>2019</b> , <i>31</i> , 1900178           |
| Zn <sub>0.075</sub> S-Co <sub>0.925</sub> P/CP             | 1.51                                       | This work                                                      |
